# Supplementary material for: QStatin, a Selective Inhibitor of Quorum Sensing in Vibrio Species
Source: PubMed Central journal article supplement (PMC5790914; doi:10.1128/mbio.02262-17), 2018-01-30

a

| Chemical                                                                                                   | % SmcR-inhibition |
|------------------------------------------------------------------------------------------------------------|-------------------|
| <p>357D10</p> 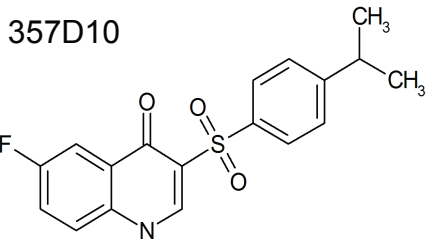            | 39.0              |
| <p>359H12</p>             | 63.5              |
| <p>366H12</p>            | 20.4              |
| <p>377B6 (QStatin)</p>  | 45.8              |

b

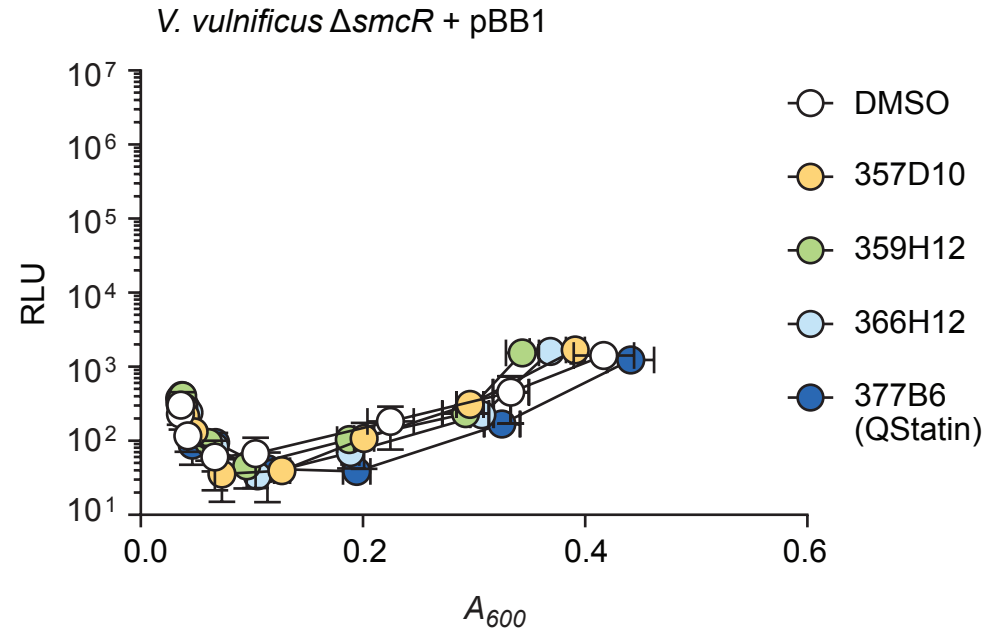

c

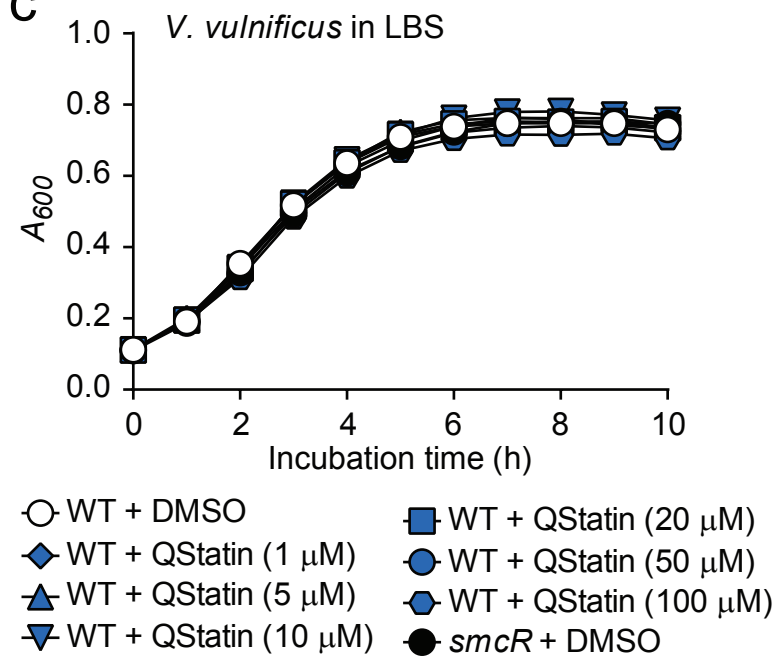

d

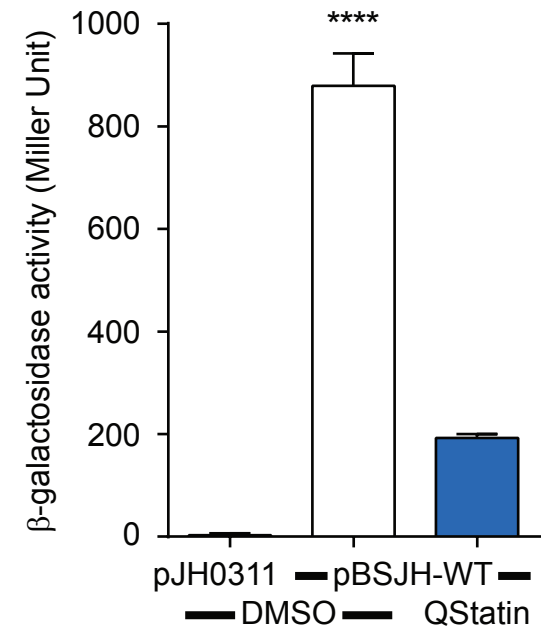

Supplement: mbo001183700sf1.pdf [file mbo001183700sf1.pdf]
