# Supplementary material for: QStatin, a Selective Inhibitor of Quorum Sensing in Vibrio Species
Source: PubMed Central journal article supplement (PMC5790914; doi:10.1128/mbio.02262-17), 2018-01-30
Supplement: mbo001183700sf3.pdf [file mbo001183700sf3.pdf]

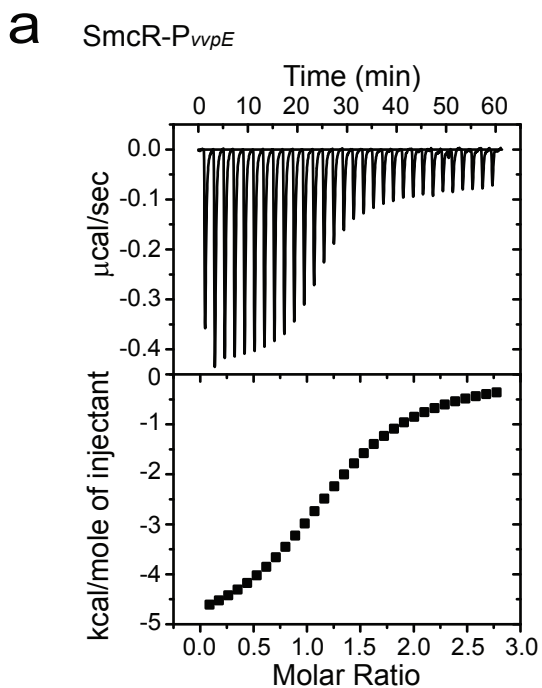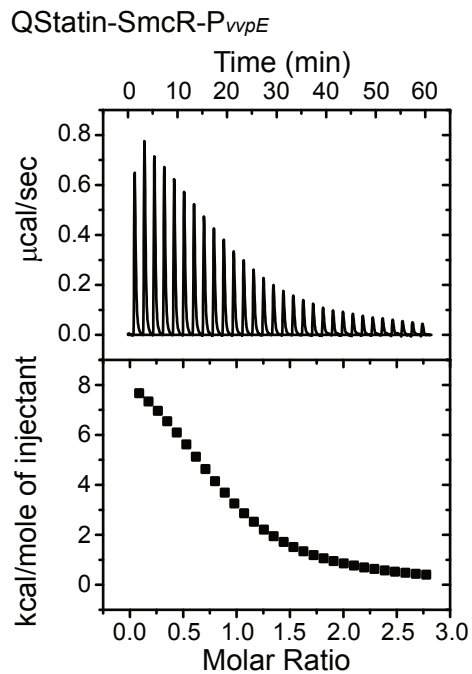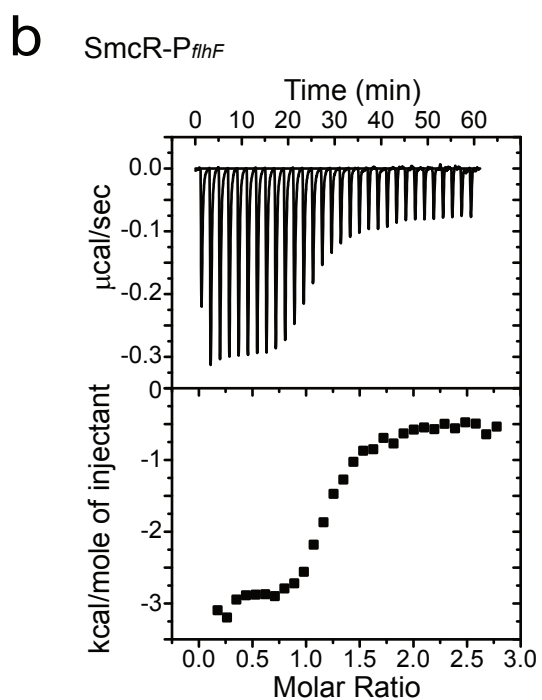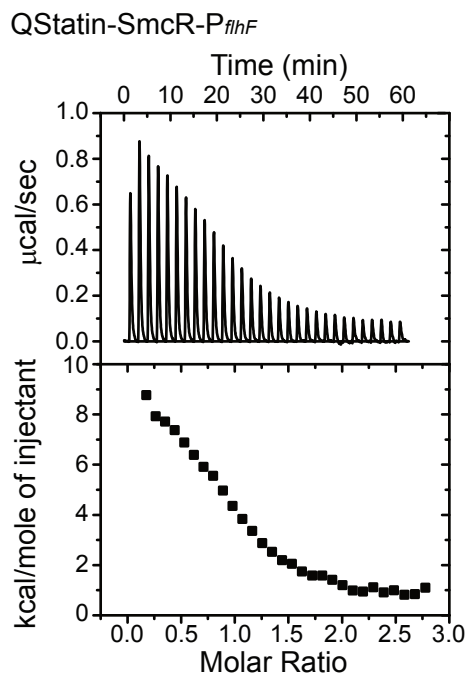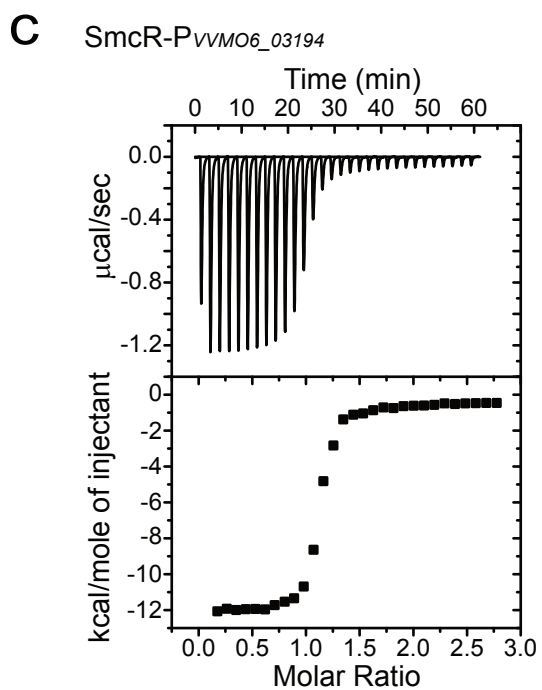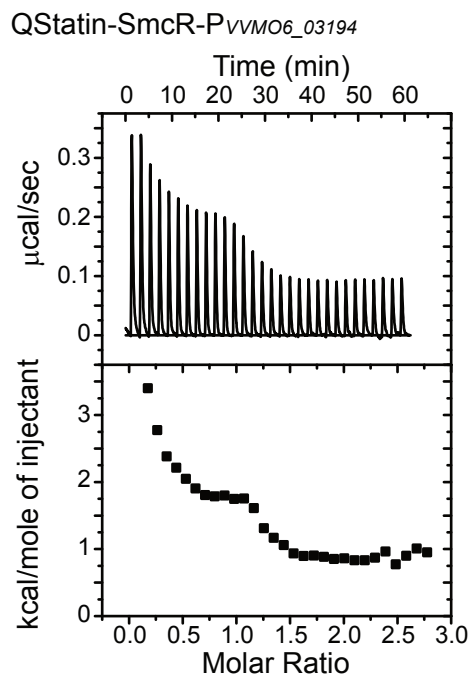

Figure S3. Kim *et al.*

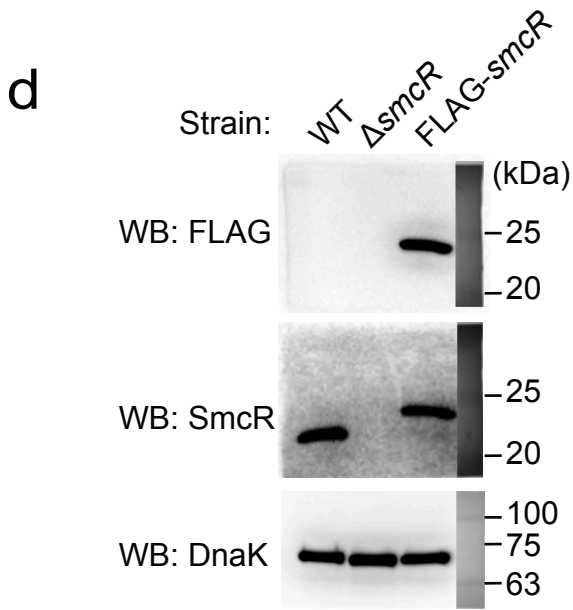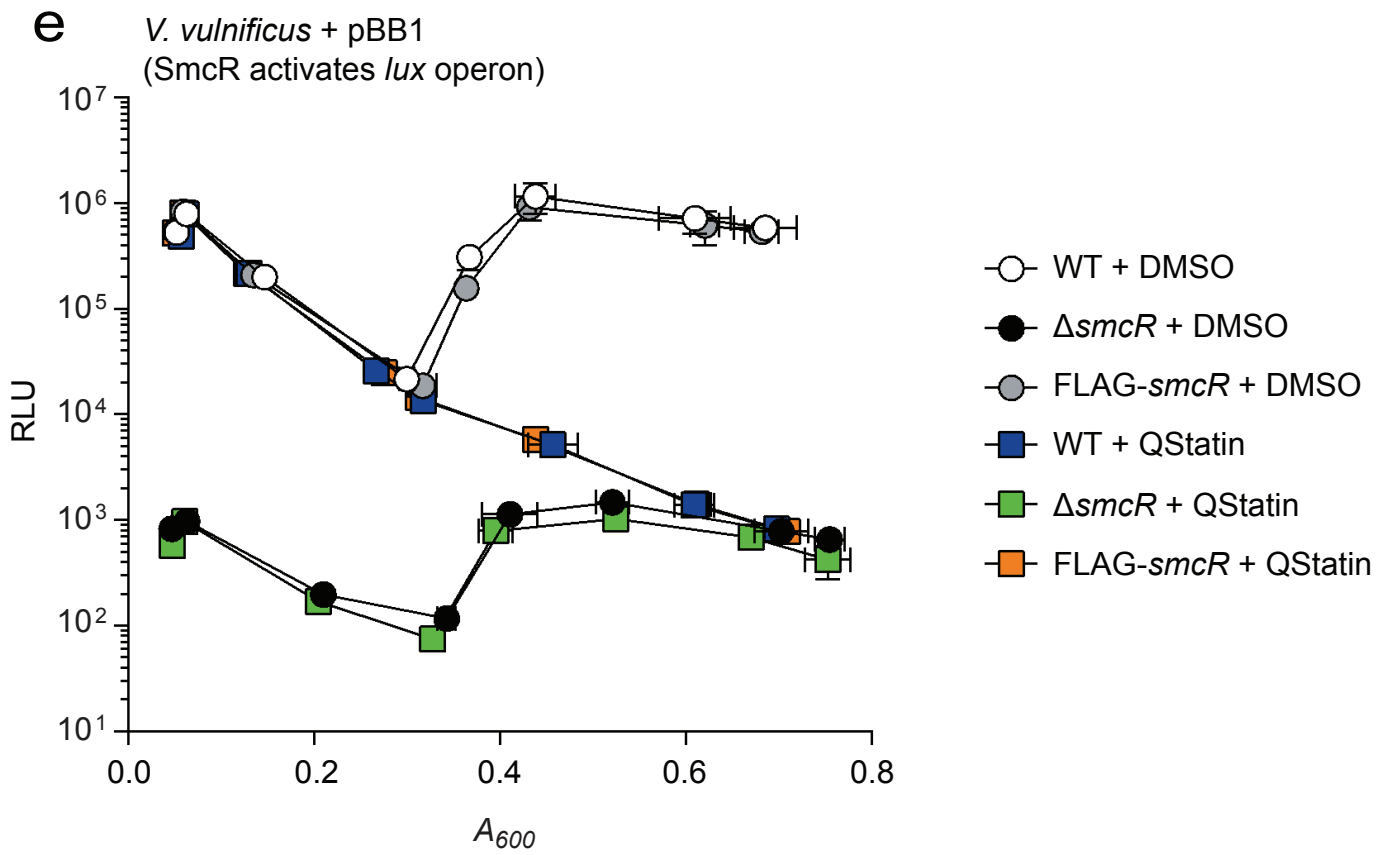

Figure S3. Kim *et al.*
